# Supplementary material for: Multiscale modeling uncovers 7q11.23 copy number variation–dependent changes in ribosomal biogenesis and neuronal maturation and excitability
Source: JCI journal article supplement (doi:10.1172/jci168982), 2024-07-14
Supplement: sd1 [file 1]

301 Moved Permanently

# Moved Permanently

The document has moved here.
