# Supplementary material for: Multiscale modeling uncovers 7q11.23 copy number variation–dependent changes in ribosomal biogenesis and neuronal maturation and excitability
Source: JCI journal article supplement (doi:10.1172/jci168982), 2024-07-14

Full unedited blots related to Figure 1D and SF1H, differentiations #1, #2, #3 and #4

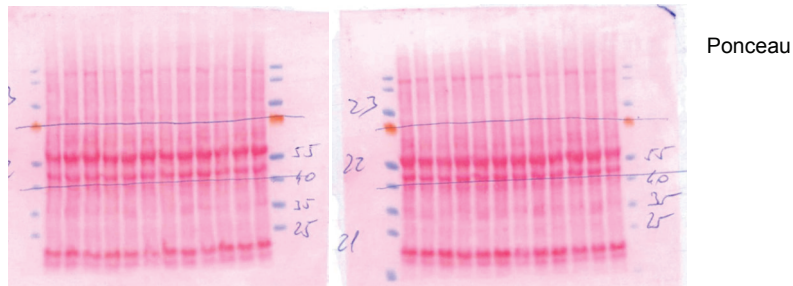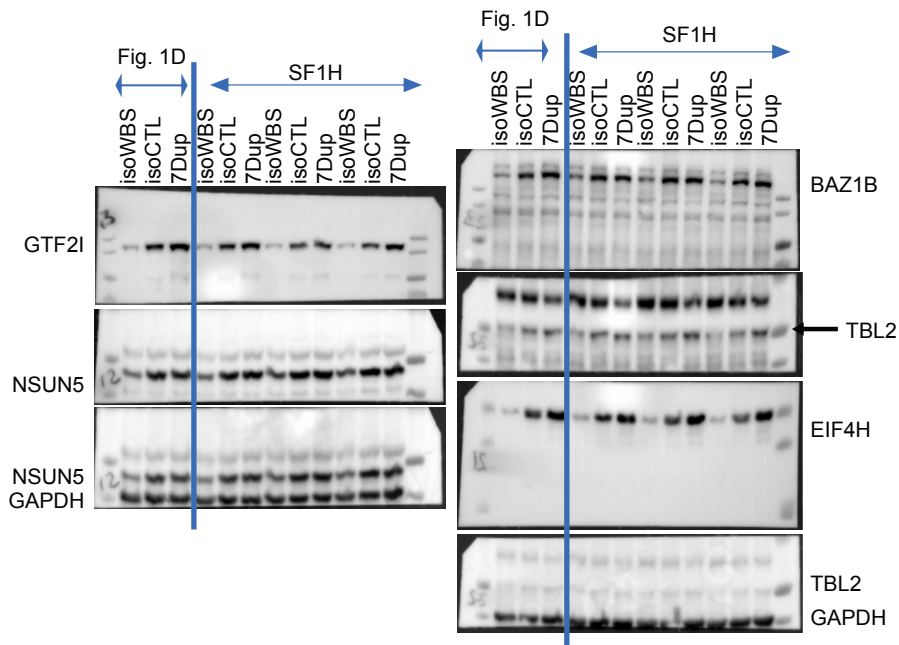

Full unedited blots for Figure S1B

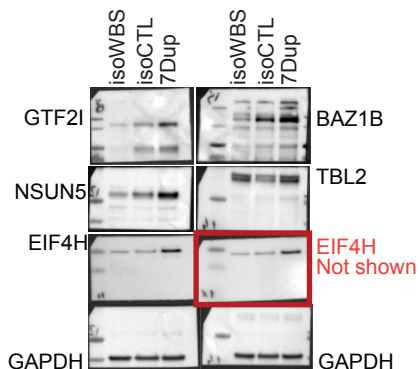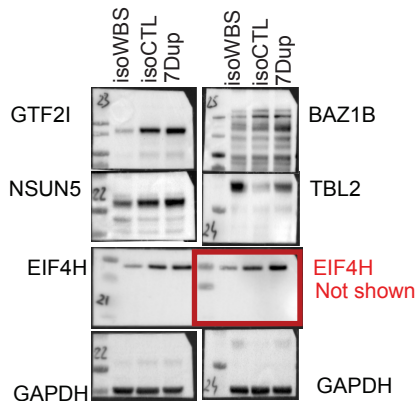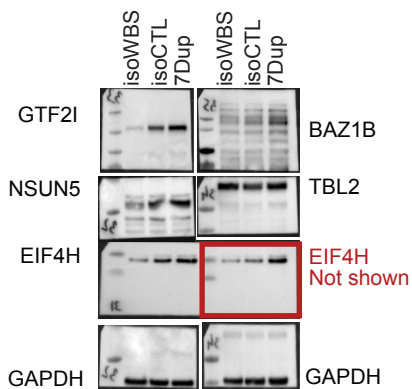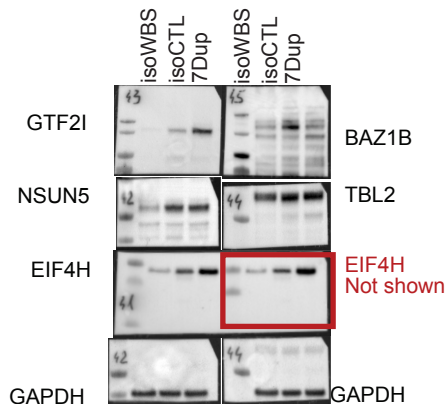



Figure 5H

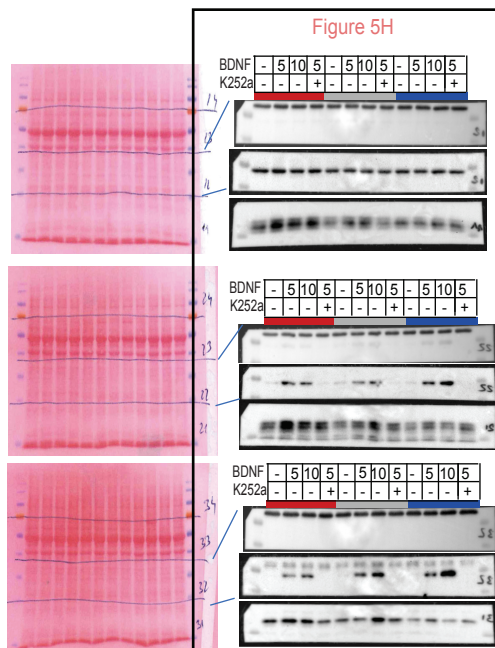

Supplemental Figure SF5

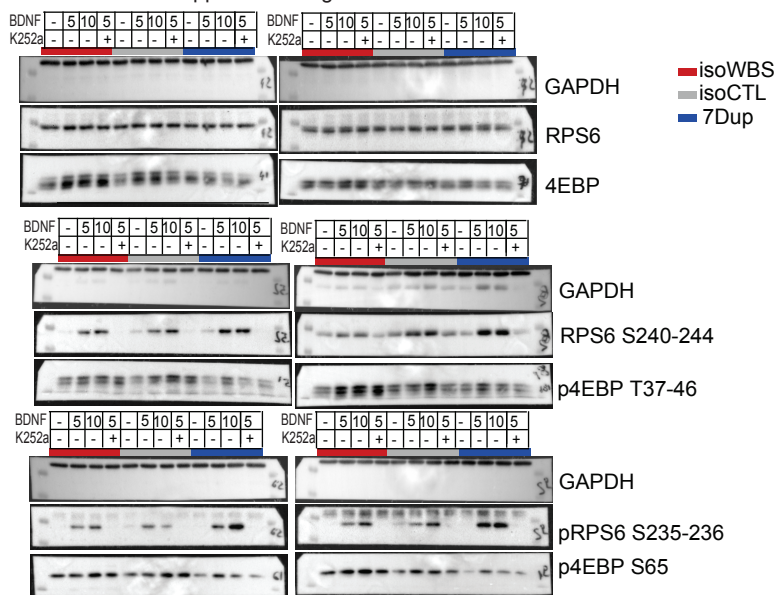

Supplemental Figure SF5

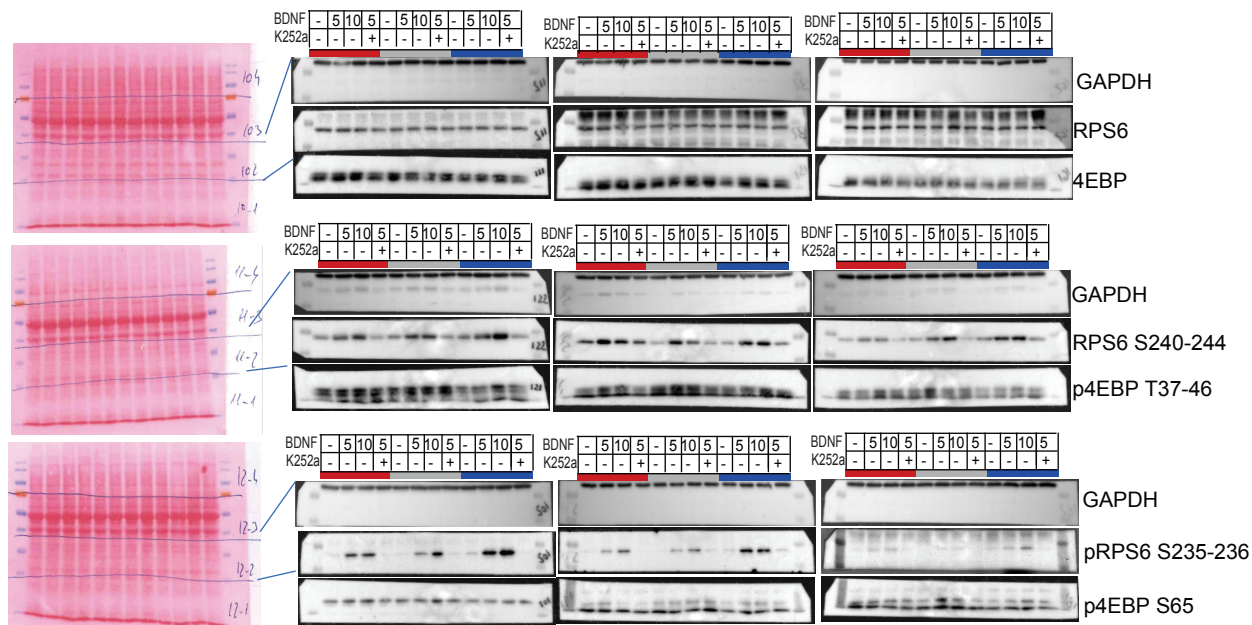

Full unedited blots related to Figures S4H. Only EIF2a, total and phospho, and vinculin (VCL) were used from these gels.

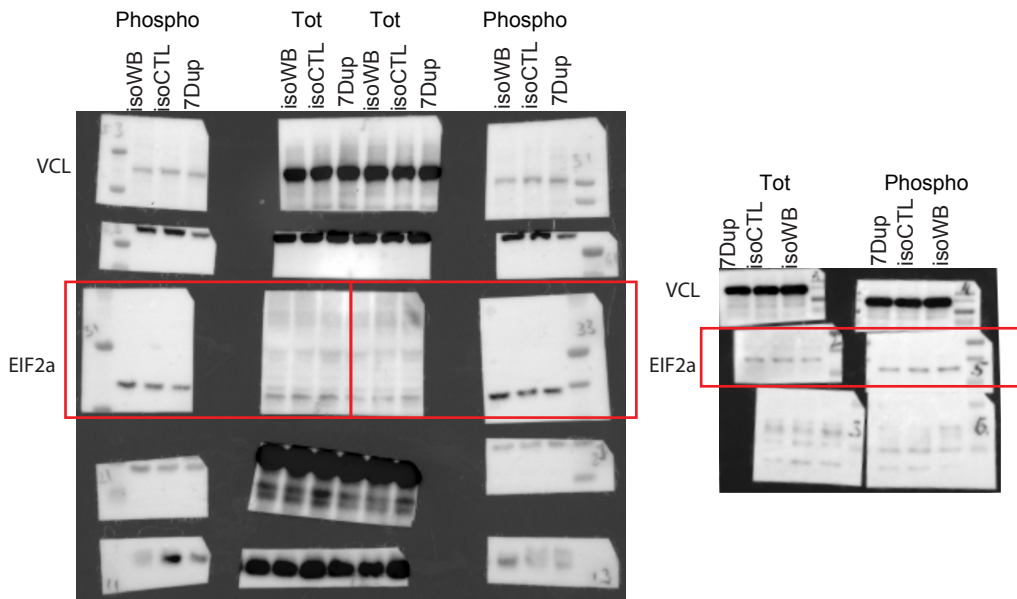

Full unedited blots related to Figure S6F

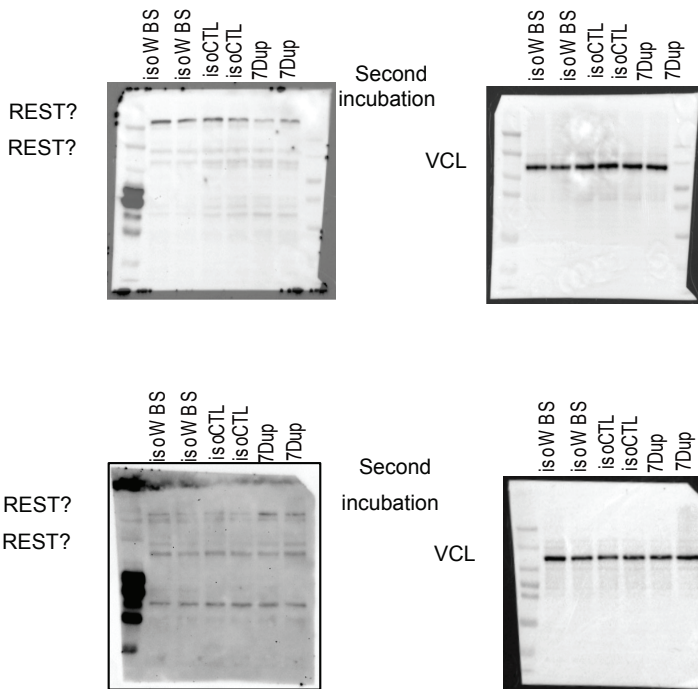

Full unedited blots related to Figures 5J and S4G

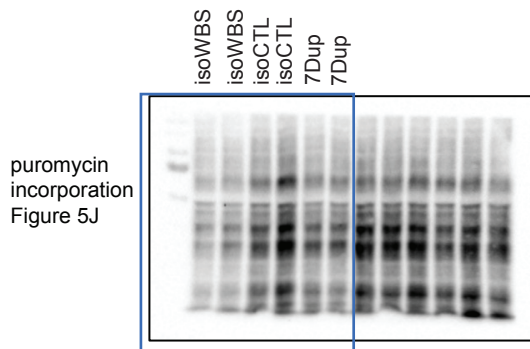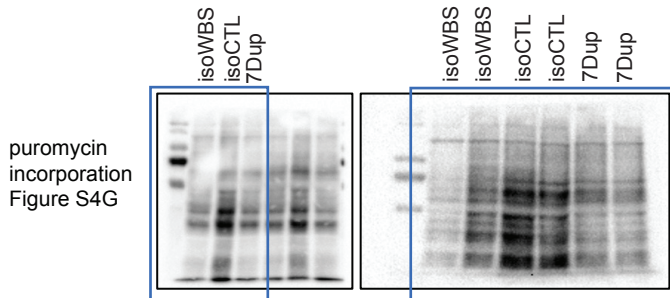

Supplement: sd2 [file 2]
